# Supplementary material for: Extrapulmonary tuberculosis in Pakistan- A nation-wide multicenter retrospective study
Source: PubMed Central journal article supplement (PMC7188211; doi:10.1371/journal.pone.0232134), 2020-04-28
Supplement: pone.0232134.s001.pdf [file pone.0232134.s001.pdf]

## Support document

S1 Figure: Pakistan map showing provincial and regional boundaries

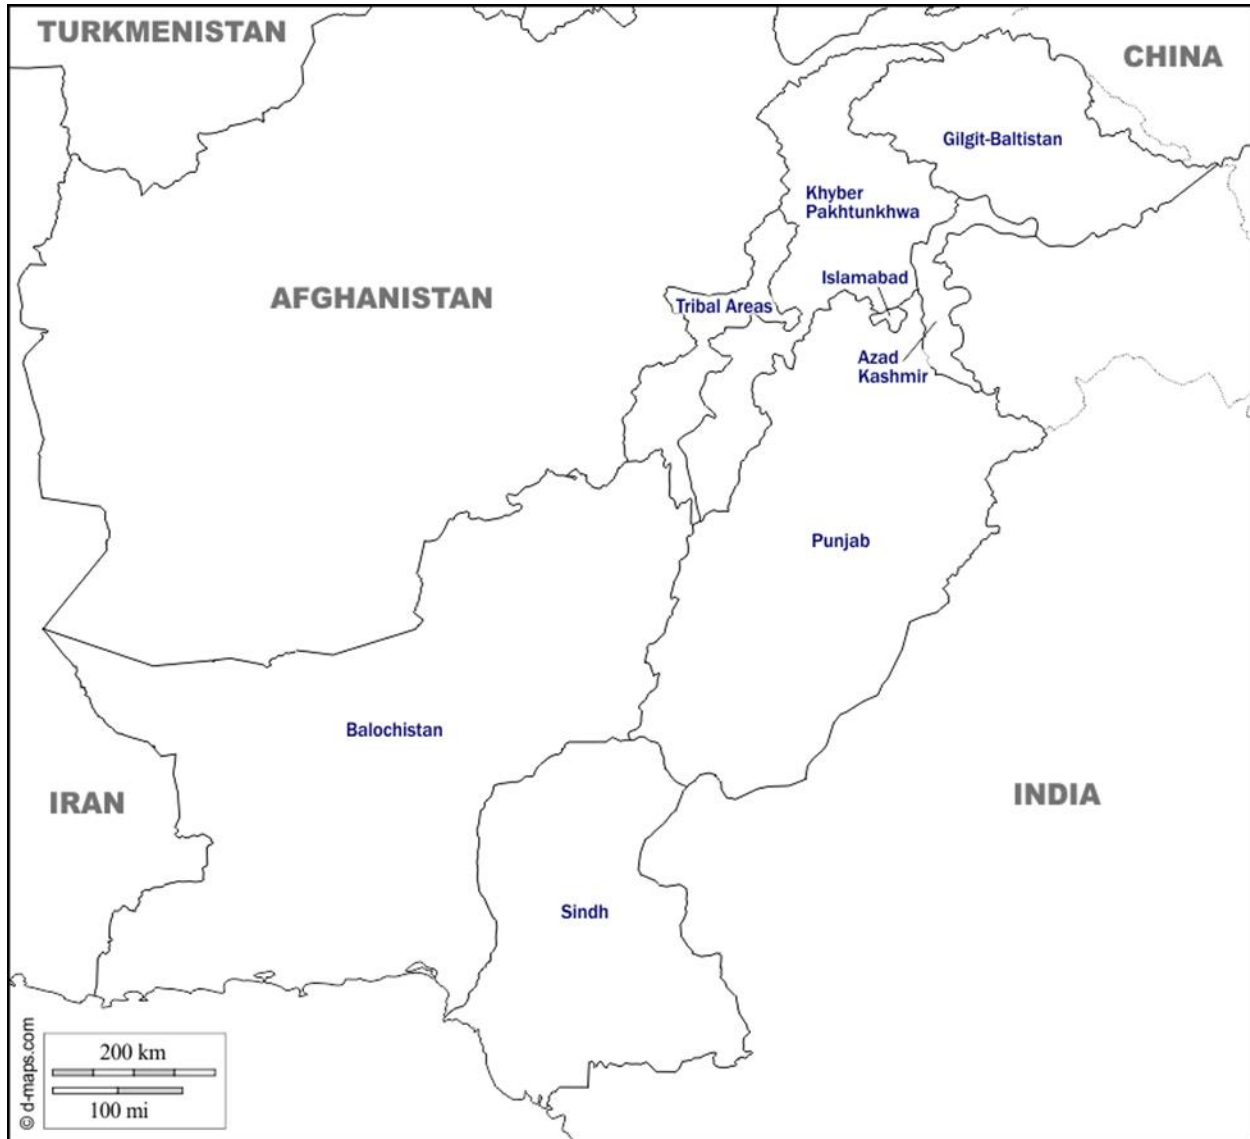

Source ; Pakistan – provinces Azad Kashmir, Balochistan, Gilgit- Baltistan, Islamabad, Khyber Pakhtunkhwa, Punjab, Sindh, Tribal Areas.

<https://d-maps.com/m/asia/pakistan/pakistan/pakistan18.gif>
