# Supplementary material for: Extrapulmonary tuberculosis in Pakistan- A nation-wide multicenter retrospective study
Source: PubMed Central journal article supplement (PMC7188211; doi:10.1371/journal.pone.0232134), 2020-04-28
Supplement: pone.0232134.s002.pdf [file pone.0232134.s002.pdf]

**S1 Table: Characteristics of the selected health care facilities and TB cases notified in 2016**

|    | Province | Health Care facility |              |                      |                  | Diagnostic Facility |     | TB-Register | ALL TB Cases (n) | Total PTB | Extra Pulmonary TB |       |                |        |
|----|----------|----------------------|--------------|----------------------|------------------|---------------------|-----|-------------|------------------|-----------|--------------------|-------|----------------|--------|
|    |          | Code                 | District     | Health care provider | Health care Tier | Gxpert              | H/P |             |                  |           | (n)                | %     | Site specified |        |
|    |          |                      |              |                      |                  |                     |     |             |                  |           |                    |       | (n)            | (%)    |
| 1  | PJB      | p-1                  | Lahore       | Public               | THC              | Yes                 | Yes | Paper       | 1523             | 510       | 1013               | 66.5% | 768            | 75.8%  |
| 2  | PJB      | p-2                  | Sargodha     | Public               | SHC              | Yes                 | No  | Paper       | 2022             | 1444      | 578                | 28.6% | 536            | 92.7%  |
| 3  | PJB      | p-3                  | Lahore       | Public               | PHC              | No                  | No  | Paper       | 840              | 636       | 204                | 24.3% | 172            | 84.3%  |
| 4  | PJB      | p-4                  | Sahiwal      | Public               | PHC              | No                  | No  | Paper       | 251              | 173       | 78                 | 31.1% | 74             | 94.9%  |
| 5  | PJB      | p-5                  | Lahore       | Private              | THC              | Yes                 | Yes | Elect       | 7253             | 6102      | 1151               | 15.9% | 1149           | 99.8%  |
| 6  | PJB      | p-6                  | Bahawalnagar | Private              | GP               | No                  | No  | Elect       | 1122             | 956       | 166                | 14.8% | 166            | 100.0% |
| 7  | PJB      | p-7                  | Bahawalpur   | Private              | GP               | No                  | No  | Elect       | 426              | 408       | 18                 | 4.2%  | 18             | 100.0% |
| 8  | PJB      | p-8                  | Faisalabad   | Private              | GP               | No                  | No  | Elect       | 1981             | 1482      | 499                | 25.2% | 498            | 99.8%  |
| 9  | PJB      | p-9                  | Gujrat       | Private              | GP               | No                  | No  | Elect       | 226              | 215       | 11                 | 4.9%  | 11             | 100.0% |
| 10 | PJB      | p-10                 | Lahore       | Private              | GP               | No                  | No  | Elect       | 3288             | 2409      | 879                | 26.7% | 807            | 91.8%  |
| 11 | PJB      | p-11                 | Muzaffargarh | Private              | GP               | No                  | No  | Elect       | 1197             | 767       | 430                | 35.9% | 430            | 100.0% |
| 12 | PJB      | p-12                 | Rawalpindi   | Private              | GP               | No                  | No  | Elect       | 979              | 694       | 285                | 29.1% | 280            | 98.2%  |
| 13 | PJB      | p-13                 | R.Y. Khan    | Private              | GP               | No                  | No  | Elect       | 1634             | 1472      | 162                | 9.9%  | 158            | 97.5%  |
| 14 | PJB      | p-14                 | Shaikhupura  | Private              | GP               | No                  | No  | Elect       | 788              | 682       | 106                | 13.5% | 50             | 47.2%  |
| 15 | SND      | S-1                  | Larkana      | Public               | THC              | Yes                 | Yes | Paper       | 1169             | 802       | 367                | 31.4% | 298            | 81.2%  |
| 16 | SND      | S-2                  | Karachi      | Public               | THC              | Yes                 | Yes | Paper       | 1145             | 839       | 306                | 26.7% | 301            | 98.4%  |
| 17 | SND      | S-3                  | Jamshoro     | Public               | SHC              | Yes                 | NO  | Paper       | 4036             | 3425      | 611                | 15.1% | 610            | 99.8%  |
| 18 | SND      | S-4                  | Hyderabad    | Public               | SHC              | No                  | NO  | Paper       | 358              | 172       | 186                | 52.0% | 186            | 100.0% |
| 19 | SND      | S-5                  | Khairpur     | Public               | SHC              | No                  | NO  | Paper       | 1450             | 1201      | 249                | 17.2% | 236            | 94.8%  |
| 20 | SND      | S-6                  | Karachi      | Public               | PHC              | Yes                 | NO  | Paper       | 882              | 735       | 147                | 16.7% | 144            | 98.0%  |
| 21 | SND      | S-7                  | Khairpur     | Public               | PHC              | No                  | NO  | Paper       | 239              | 188       | 51                 | 21.3% | 51             | 100.0% |
| 22 | SND      | S-8                  | Karachi      | Private              | THC              | Yes                 | Yes | Paper       | 2688             | 2041      | 647                | 24.1% | 644            | 99.5%  |
| 23 | SND      | S-9                  | Karachi      | Private              | GP               | No                  | NO  | Excel       | 2722             | 1947      | 775                | 28.5% | 769            | 99.2%  |
| 24 | SND      | S-10                 | Hyderabad    | Private              | GP               | No                  | NO  | Excel       | 439              | 359       | 80                 | 18.2% | 80             | 100.0% |
| 25 | SND      | S-11                 | Sukker       | Private              | GP               | No                  | NO  | Excel       | 680              | 585       | 95                 | 14.0% | 94             | 98.9%  |
| 26 | KP       | K-1                  | Peshawar     | Public               | THC              | Yes                 | Yes | Paper       | 256              | 110       | 146                | 57.0% | 138            | 94.5%  |
| 27 | KP       | K-2                  | Mansehra     | Public               | THC              | No                  | NO  | Excel       | 423              | 262       | 161                | 38.1% | 160            | 99.4%  |
| 28 | KP       | K-3                  | Peshawar     | Public               | SHC              | Yes                 | NO  | Excel       | 1830             | 808       | 1022               | 55.8% | 729            | 71.3%  |
| 29 | KP       | K-4                  | Mardan       | Public               | SHC              | Yes                 | NO  | Paper       | 2035             | 881       | 1154               | 56.7% | 1037           | 89.9%  |
| 30 | KP       | K-5                  | Mardan       | Public               | PHC              | No                  | NO  | Excel       | 268              | 173       | 95                 | 35.4% | 80             | 84.2%  |
| 31 | KP       | K-6                  | Peshawar     | Public               | PHC              | No                  | NO  | Paper       | 211              | 139       | 72                 | 34.1% | 71             | 98.6%  |

| 32                                 | KP          | K-7           | Peshawar      | Private              | GP                  | No       | NO           | Excel        | 2779         | 1499              | 1280         | 46.1%          | 1261         | 98.5%  |
|------------------------------------|-------------|---------------|---------------|----------------------|---------------------|----------|--------------|--------------|--------------|-------------------|--------------|----------------|--------------|--------|
| 33                                 | BTN         | B-1           | Quetta        | Public               | THC                 | No       | Yes          | Paper        | 626          | 227               | 399          | 63.7%          | 394          | 98.7%  |
| 34                                 | BTN         | B-2           | K.Abdullah    | Public               | SHC                 | No       | NO           | Paper        | 600          | 480               | 120          | 20.0%          | 112          | 93.3%  |
| 35                                 | BTN         | B-3           | Jafferabad    | Public               | SHC                 | No       | NO           | Paper        | 343          | 246               | 97           | 28.3%          | 1            | 1.0%   |
| 36                                 | BTN         | B-4           | Zhob          | Public               | PHC                 | No       | NO           | Paper        | 542          | 357               | 185          | 34.1%          | 90           | 48.6%  |
| 47                                 | FATA        | F-1           | Bajour        | Public               | PHC                 | Yes      | No           | Paper        | 650          | 336               | 314          | 48.3%          | 307          | 97.8%  |
| 48                                 | FATA        | F-2           | Khyber agency | Public               | PHC                 | Yes      | No           | Paper        | 288          | 130               | 158          | 54.9%          | 158          | 100.0% |
| 42                                 | GB          | G-1           | Skardu        | Public               | SHC                 | No       | No           | Paper        | 120          | 83                | 37           | 30.8%          | 34           | 91.9%  |
| 43                                 | GB          | G-2           | Skardu        | Public               | PHC                 | No       | No           | Paper        | 339          | 226               | 113          | 33.3%          | 111          | 98.2%  |
| 44                                 | GB          | G-3           | Gligit        | Public               | PHC                 | No       | No           | Paper        | 347          | 227               | 120          | 34.6%          | 120          | 100.0% |
| 45                                 | GB          | G-4           | Tangir        | Public               | PHC                 | No       | No           | Paper        | 234          | 178               | 56           | 23.9%          | 56           | 100.0% |
| 46                                 | GB          | G-5           | Challas       | Public               | PHC                 | No       | No           | Paper        | 653          | 542               | 111          | 17.0%          | 111          | 100.0% |
| 37                                 | AJK         | A-1           | Muzaffrabad   | Public               | THC                 | Yes      | Yes          | Paper        | 188          | 104               | 84           | 44.7%          | 78           | 92.9%  |
| 38                                 | AJK         | A-2           | Kotli         | Public               | SHC                 | No       | NO           | Paper        | 174          | 114               | 60           | 34.5%          | 60           | 100.0% |
| 39                                 | AJK         | A-3           | Mirpur        | Public               | SHC                 | No       | NO           | Paper        | 179          | 124               | 55           | 30.7%          | 54           | 98.2%  |
| 41                                 | AJK         | A-4           | Muzaffrabad   | Public               | PHC                 | No       | NO           | Paper        | 310          | 177               | 133          | 42.9%          | 131          | 98.5%  |
| 40                                 | AJK         | A-5           | Mirpur        | Public               | PHC                 | No       | No           | Paper        | 73           | 58                | 15           | 20.5%          | 15           | 100.0% |
| 49                                 | ICT         | I-1           | ICT           | Public               | THC                 | No       | Yes          | Paper        | 1256         | 555               | 701          | 55.8%          | 605          | 86.3%  |
| 50                                 | ICT         | I-2           | ICT           | Public               | PHC                 | No       | No           | Paper        | 30           | 22                | 8            | 26.7%          | 8            | 100.0% |
|                                    |             |               |               |                      |                     |          |              |              |              |                   |              |                |              |        |
| <b>Provincial/Regional summary</b> |             |               |               |                      |                     |          |              |              |              |                   |              |                |              |        |
| Province /Regions                  | Study sites | Districts (n) | HCP           | HC-Tier              | Diagnostic Facility |          | TB register  | All TB       | Total PTB    | Extrapulmonary TB |              |                |              |        |
|                                    |             |               | Pub+Pvt       | P+S+T                | GX                  | HP       | P+E          |              |              | (n)               | (%)          | Site specified |              |        |
| PJB                                | 14          | 10            | 4+10          | 11+1+2               | 3                   | 2        | 4+10         | 23530        | 17950        | 5580              | 23.7%        | 5117           | 91.7%        |        |
| SND                                | 11          | 6             | 7+4           | 05+3+3               | 5                   | 3        | 8+03         | 15808        | 12294        | 3514              | 22.2%        | 3413           | 97.1%        |        |
| KP                                 | 7           | 3             | 6+1           | 03+2+2               | 1                   | 1        | 3+04         | 7802         | 3872         | 3930              | 50.4%        | 3476           | 88.4%        |        |
| BTN                                | 4           | 4             | 4+0           | 01+2+1               | 0                   | 1        | 4+0          | 2111         | 1310         | 801               | 37.9%        | 597            | 74.5%        |        |
| FATA                               | 2           | 2             | 2+0           | 02+0+0               | 2                   | 0        | 2+0          | 938          | 466          | 472               | 50.3%        | 465            | 98.5%        |        |
| GB                                 | 5           | 3             | 5+0           | 04+1+0               | 0                   | 0        | 5+0          | 1693         | 1256         | 437               | 25.8%        | 432            | 98.9%        |        |
| AJK                                | 5           | 3             | 5+0           | 02+2+1               | 1                   | 1        | 5+0          | 924          | 577          | 347               | 37.6%        | 338            | 97.4%        |        |
| ICT                                | 2           | 1             | 2+0           | 01+0+1               | 0                   | 1        | 2+0          | 1286         | 577          | 709               | 55.1%        | 613            | 86.5%        |        |
| <b>G.total</b>                     | <b>50</b>   | <b>32</b>     | <b>35+15</b>  | <b>29+11+1<br/>0</b> | <b>12</b>           | <b>1</b> | <b>33+17</b> | <b>54092</b> | <b>38302</b> | <b>15790</b>      | <b>29.2%</b> | <b>14451</b>   | <b>91.5%</b> |        |

EPTB – Extra pulmonary tuberculosis, PTB-Pulmonary tuberculosis, HCF-Health care facility , HCP-Health care provider, Pub-public , Pvt – private , THC-Tertiary health care, SHC –Secondary health Care, PHC-Primary health care, GP –General Practitioner, GX- GeneXpert , HP- histopathology , PR- Paper register , ER- electronic file , PJB-Punjab, SND- Sind, KP-Khyber Pakhtunkhwa, BTN-Balochistan, AJK -Azad Jammu Kashmir, GB-Gilgit Baltistan, FATA- Federally administered tribal area, ICT-Islamabad capital Territory
