# Supplementary material for: Extrapulmonary tuberculosis in Pakistan- A nation-wide multicenter retrospective study
Source: PubMed Central journal article supplement (PMC7188211; doi:10.1371/journal.pone.0232134), 2020-04-28
Supplement: pone.0232134.s003.pdf [file pone.0232134.s003.pdf]

**S2 Table: National and study sites TB case notifications by province and region in 2016**

|                                                                                                    | <b>Pakistan</b>                    | <b>PJB</b>                         | <b>SND</b>                         | <b>KP</b>                          | <b>BTN</b>                         | <b>FATA</b>                        | <b>GB</b>                          | <b>AJK</b>                         | <b>ICT</b>                         |
|----------------------------------------------------------------------------------------------------|------------------------------------|------------------------------------|------------------------------------|------------------------------------|------------------------------------|------------------------------------|------------------------------------|------------------------------------|------------------------------------|
| Population (Million) 2016                                                                          | 189.1                              | 97.9                               | 43.4                               | 25.2                               | 9.9                                | 4.4                                | 1.2                                | 5.2                                | 1.15                               |
| <b>TB cases notified Nationally in 2016</b>                                                        |                                    |                                    |                                    |                                    |                                    |                                    |                                    |                                    |                                    |
| All TB cases                                                                                       | 366061                             | 221739                             | 72830                              | 45457                              | 10462                              | 4379                               | 2995                               | 5831                               | 2368                               |
| All PTB cases                                                                                      | 293100                             | 185985                             | 60026                              | 28623                              | 7903                               | 2909                               | 2247                               | 4227                               | 1180                               |
| All EPTB cases                                                                                     | 72961                              | 35754                              | 12804                              | 16834                              | 2559                               | 1470                               | 748                                | 1604                               | 1188                               |
| % EPTB                                                                                             | <b>19.9%</b><br><b>(19.8-20.1)</b> | <b>16.1%</b><br><b>(16.0-16.3)</b> | <b>17.6%</b><br><b>(17.3-17.9)</b> | <b>37.0%</b><br><b>(36.6-37.5)</b> | <b>24.5%</b><br><b>(23.6-25.3)</b> | <b>33.6%</b><br><b>(32.2-35.0)</b> | <b>25.0%</b><br><b>(23.4-26.6)</b> | <b>27.5%</b><br><b>(26.4-28.7)</b> | <b>50.2%</b><br><b>(48.1-52.2)</b> |
| <b>TB cases notified by study sites in 2016</b>                                                    |                                    |                                    |                                    |                                    |                                    |                                    |                                    |                                    |                                    |
| All TB cases                                                                                       | 54092                              | 23530                              | 15808                              | 7802                               | 2111                               | 938                                | 1693                               | 924                                | 1286                               |
| All PTB cases                                                                                      | 38302                              | 17950                              | 12294                              | 3872                               | 1310                               | 466                                | 1256                               | 577                                | 577                                |
| All EPTB cases                                                                                     | 15790                              | 5580                               | 3514                               | 3930                               | 801                                | 472                                | 437                                | 347                                | 709                                |
| % EPTB                                                                                             | <b>29.2%</b>                       | <b>23.7%</b>                       | <b>22.2%</b>                       | <b>50.4%</b>                       | <b>37.9%</b>                       | <b>50.3%</b>                       | <b>25.8%</b>                       | <b>37.6%</b>                       | <b>55.1%</b>                       |
| <b>Proportion of notified TB cases included in study sample</b>                                    |                                    |                                    |                                    |                                    |                                    |                                    |                                    |                                    |                                    |
| % TB cases                                                                                         | 14.8%                              | 10.6%                              | 21.7%                              | 17.2%                              | 20.2%                              | 21.4%                              | 56.5%                              | 15.8%                              | 54.3%                              |
| % PTB cases                                                                                        | 13.1%                              | 9.7%                               | 20.5%                              | 13.5%                              | 16.6%                              | 16.0%                              | 55.9%                              | 13.7%                              | 48.9%                              |
| % EPTB cases                                                                                       | 21.6%                              | 15.6%                              | 27.4%                              | 23.3%                              | 31.3%                              | 32.1%                              | 58.4%                              | 21.6%                              | 59.7%                              |
| <b>Health care facilities sampled *</b>                                                            |                                    |                                    |                                    |                                    |                                    |                                    |                                    |                                    |                                    |
| PHC (Level-I)                                                                                      | 16/810                             | 2/371                              | 2/134                              | 2/126                              | 1/119                              | 2/10                               | 4/13                               | 2/37                               | 1/4                                |
| PHC (Dist.GP clusters)*                                                                            | 13/92                              | 13/36                              | 3/20                               | 1/18                               | 0/9                                | 0/0                                | 0/3                                | 0/5                                | 0/1                                |
| SHC (Level-II)                                                                                     | 11/397                             | 1/151                              | 3/84                               | 2/90                               | 2/32                               | 0                                  | 1/13                               | 2/9                                | 0/4                                |
| THC(level-III)                                                                                     | 10/46                              | 2/20                               | 3/12                               | 2/9                                | 1/3                                | 0                                  | 0                                  | 1/1                                | 1/1                                |
| Total                                                                                              | 50/1345                            | 18/378                             | 11/250                             | 7/243                              | 4/163                              | 2/10                               | 5/29                               | 5/52                               | 2/10                               |
| *Data is number of health facilities sampled / total number of reporting health facilities in 2016 |                                    |                                    |                                    |                                    |                                    |                                    |                                    |                                    |                                    |

PTB- Pulmonary tuberculosis , EPTB – Extra pulmonary tuberculosis, N=New TB case , R=Relapse TB case, GB – Gilgit Baltistan, KPK – Khyber Pakhtunkhwa, AJK-Azad Jamu Kashmir, FATA- Federally administered tribal area, ICT – Islamabad capital Territory , GP- General practitioner .
