# Supplementary material for: Extrapulmonary tuberculosis in Pakistan- A nation-wide multicenter retrospective study
Source: PubMed Central journal article supplement (PMC7188211; doi:10.1371/journal.pone.0232134), 2020-04-28
Supplement: pone.0232134.s004.pdf [file pone.0232134.s004.pdf]

**S3 Table: Age and sex specific pulmonary and extrapulmonary tuberculosis notifications and odds of female (OR) for having extrapulmonary tuberculosis by place of residence.**

|                           | F<br>EPTB | F<br>PTB | M<br>EPTB | M<br>PTB | OR   | 95% CI    | F<br>EPTB          | F<br>PTB | M<br>EPTB | M<br>PTB | OR   | 95% CI    | F<br>EPTB                          | F<br>PTB | M<br>EPTB | M<br>PTB | OR   | 95% CI    |
|---------------------------|-----------|----------|-----------|----------|------|-----------|--------------------|----------|-----------|----------|------|-----------|------------------------------------|----------|-----------|----------|------|-----------|
| <b>All STUDY SITES</b>    |           |          |           |          |      |           | <b>PUNJAB</b>      |          |           |          |      |           | <b>SINDH</b>                       |          |           |          |      |           |
| <b>0-14</b>               | 1835      | 2501     | 1772      | 2230     | 0.92 | 0.85-1.00 | 318                | 525      | 184       | 257      | 0.85 | 0.67-1.07 | 249                                | 1074     | 155       | 968      | 1.45 | 1.16-1.80 |
| <b>15-24</b>              | 2597      | 5714     | 1877      | 4218     | 1.02 | 0.95-1.1  | 1073               | 2683     | 817       | 1999     | 0.98 | 0.88-1.09 | 775                                | 1819     | 425       | 1326     | 1.33 | 1.16-1.53 |
| <b>25-34</b>              | 1628      | 3240     | 1246      | 3234     | 1.30 | 1.19-1.42 | 657                | 1538     | 551       | 1577     | 1.22 | 1.07-1.39 | 465                                | 1031     | 303       | 1158     | 1.72 | 1.46-2.04 |
| <b>35-44</b>              | 808       | 2195     | 841       | 2525     | 1.11 | 0.98-1.23 | 319                | 1176     | 379       | 1379     | 0.99 | 0.83-1.17 | 198                                | 626      | 212       | 839      | 1.25 | 1.00-1.56 |
| <b>45-54</b>              | 625       | 2152     | 726       | 2794     | 1.12 | 0.99-1.26 | 253                | 1199     | 311       | 1525     | 1.03 | 0.86-1.24 | 146                                | 555      | 194       | 940      | 1.27 | 1.00-1.62 |
| <b>55-64</b>              | 440       | 1686     | 518       | 2389     | 1.20 | 1.04-1.38 | 183                | 916      | 191       | 1218     | 1.27 | 1.02-1.59 | 89                                 | 389      | 147       | 780      | 1.21 | 0.91-1.62 |
| <b>65+</b>                | 335       | 1355     | 539       | 2050     | 0.94 | 0.80-1.09 | 135                | 778      | 207       | 1164     | 0.98 | 0.77-1.23 | 61                                 | 269      | 95        | 520      | 1.24 | 0.87-1.77 |
| <b>KHYBER PAKHTUNKHWA</b> |           |          |           |          |      |           | <b>BALUCHISTAN</b> |          |           |          |      |           | <b>AZAD JAMMU KASHMIR</b>          |          |           |          |      |           |
| <b>0-14</b>               | 868       | 381      | 981       | 353      | 0.82 | 0.69-0.97 | 185                | 234      | 191       | 260      | 1.08 | 0.82-1.41 | 19                                 | 29       | 15        | 20       | 0.87 | 0.36-2.12 |
| <b>15-24</b>              | 420       | 698      | 378       | 571      | 0.91 | 0.76-1.09 | 79                 | 114      | 58        | 58       | 0.69 | 0.44-1.10 | 41                                 | 93       | 42        | 49       | 0.51 | 0.29-0.89 |
| <b>25-34</b>              | 267       | 296      | 198       | 276      | 1.26 | 0.98-1.61 | 54                 | 132      | 40        | 50       | 0.51 | 0.30-0.86 | 35                                 | 42       | 34        | 38       | 0.93 | 0.49-1.77 |
| <b>35-44</b>              | 143       | 175      | 119       | 153      | 1.05 | 0.76-1.46 | 35                 | 56       | 18        | 36       | 1.25 | 0.62-2.53 | 23                                 | 30       | 25        | 31       | 0.95 | 0.45-2.03 |
| <b>45-54</b>              | 131       | 200      | 95        | 146      | 1.01 | 0.72-1.41 | 20                 | 57       | 21        | 44       | 0.74 | 0.36-1.52 | 21                                 | 29       | 21        | 47       | 1.62 | 0.76-3.47 |
| <b>55-64</b>              | 91        | 173      | 81        | 181      | 1.18 | 0.82-1.69 | 20                 | 87       | 20        | 63       | 0.72 | 0.36-1.46 | 10                                 | 30       | 16        | 42       | 0.88 | 0.35-2.19 |
| <b>65+</b>                | 61        | 121      | 96        | 148      | 0.78 | 0.52-1.16 | 22                 | 54       | 38        | 65       | 0.70 | 0.37-1.32 | 15                                 | 49       | 30        | 48       | 0.49 | 0.23-1.02 |
| <b>GILGIT BALTISTAN</b>   |           |          |           |          |      |           | <b>FATA</b>        |          |           |          |      |           | <b>ISLAMABAD CAPITAL TERRITORY</b> |          |           |          |      |           |
| <b>0-14</b>               | 89        | 213      | 103       | 330      | 1.34 | 0.96-1.87 | 83                 | 30       | 132       | 37       | 0.79 | 0.45-1.35 | 24                                 | 15       | 11        | 5        | 1.34 | 0.96-1.87 |
| <b>15-24</b>              | 63        | 169      | 26        | 80       | 1.15 | 0.68-1.95 | 38                 | 55       | 34        | 65       | 1.32 | 0.74-2.37 | 108                                | 83       | 97        | 70       | 0.94 | 0.62-1.43 |
| <b>25-34</b>              | 40        | 120      | 17        | 23       | 0.45 | 0.22-0.93 | 36                 | 45       | 26        | 45       | 1.38 | 0.72-2.66 | 74                                 | 36       | 77        | 67       | 1.79 | 1.07-2.99 |
| <b>35-44</b>              | 19        | 76       | 10        | 20       | 0.50 | 0.20-1.24 | 18                 | 22       | 22        | 18       | 0.67 | 0.28-1.62 | 53                                 | 34       | 56        | 49       | 1.36 | 0.77-2.43 |
| <b>45-54</b>              | 11        | 60       | 12        | 19       | 0.29 | 0.11-0.76 | 10                 | 23       | 19        | 17       | 0.39 | 0.14-1.05 | 33                                 | 29       | 53        | 56       | 1.20 | 0.64-2.25 |
| <b>55-64</b>              | 12        | 40       | 13        | 40       | 0.92 | 0.38-2.27 | 10                 | 28       | 11        | 25       | 0.81 | 0.29-2.23 | 25                                 | 23       | 39        | 40       | 1.11 | 0.54-2.29 |
| <b>65+</b>                | 11        | 29       | 11        | 37       | 1.28 | 0.49-3.35 | 11                 | 31       | 22        | 22       | 0.35 | 0.14-0.88 | 19                                 | 24       | 40        | 46       | 0.91 | 0.44-1.90 |

F-EPTB-Female Extrapulmonary TB , F-PTB- Female Pulmonary TB cases, M-EPTB-Male Extrapulmonary TB , M-PTB-Male Pulmonary TB cases, OR –Odds ratio
