# Supplementary material for: Extrapulmonary tuberculosis in Pakistan- A nation-wide multicenter retrospective study
Source: PubMed Central journal article supplement (PMC7188211; doi:10.1371/journal.pone.0232134), 2020-04-28
Supplement: pone.0232134.s005.pdf [file pone.0232134.s005.pdf]

**S4A Table: Notified tuberculosis cases and extra-pulmonary manifestations of tuberculosis by sex, age groups and health facilities in Punjab, Pakistan during 2016**

|                                             | Site-NOS      | PLEURAL         | LN-EXT          | LN-INT        | ABD            | OAS           | OAOS          | CNS           | DIS/MIL       | OTHER         | Tot.EPTB       | All TB        | EPTB% |
|---------------------------------------------|---------------|-----------------|-----------------|---------------|----------------|---------------|---------------|---------------|---------------|---------------|----------------|---------------|-------|
| Total                                       | 463<br>(8.3%) | 2019<br>(36.2%) | 1305<br>(23.4%) | 86<br>(1.5%)  | 672<br>(12.0%) | 291<br>(5.2%) | 288<br>(5.2%) | 200<br>(3.6%) | 10<br>(0.2%)  | 246<br>(4.4%) | 5580<br>(100%) | 23530         | 23.7% |
| Median Age(IQR)                             | 28<br>(19,45) | 30<br>(20,45)   | 22<br>(16,32)   | 21<br>(16,31) | 25<br>(18,35)  | 32<br>(24,50) | 33<br>(21,50) | 30<br>(18,50) | 30<br>(23,50) | 27<br>(20,40) | 27<br>(19,40)  | 32<br>(21,50) |       |
| <b>TB cases notified by sex</b>             |               |                 |                 |               |                |               |               |               |               |               |                |               |       |
| Female                                      | 241           | 911             | 801             | 51            | 386            | 162           | 148           | 96            | 4             | 140           | 2940           | 11759         | 25.0% |
| Male                                        | 222           | 1108            | 504             | 35            | 286            | 129           | 140           | 104           | 6             | 106           | 2640           | 11771         | 22.4% |
| F:M                                         | 1.1           | 0.8             | 1.6             | 1.5           | 1.3            | 1.3           | 1.1           | 0.9           | 0.7           | 1.3           | 1.1            | 1.0           |       |
| <b>TB cases notified by age group</b>       |               |                 |                 |               |                |               |               |               |               |               |                |               |       |
| 0-14                                        | 25            | 107             | 223             | 19            | 68             | 17            | 14            | 10            |               | 19            | 502            | 1284          | 39.1% |
| 15-24                                       | 168           | 654             | 511             | 32            | 252            | 56            | 76            | 70            | 3             | 68            | 1890           | 6572          | 28.8% |
| 25-34                                       | 82            | 429             | 274             | 16            | 161            | 78            | 59            | 38            | 2             | 69            | 1208           | 4323          | 27.9% |
| 35-44                                       | 70            | 254             | 122             | 9             | 88             | 50            | 41            | 19            | 1             | 44            | 698            | 3253          | 21.5% |
| 45-54                                       | 62            | 239             | 81              | 3             | 44             | 37            | 50            | 23            | 3             | 22            | 564            | 3288          | 17.2% |
| 55-64                                       | 26            | 169             | 52              | 5             | 34             | 29            | 27            | 18            | 1             | 13            | 374            | 2508          | 14.9% |
| 65+                                         | 30            | 167             | 41              | 2             | 24             | 24            | 21            | 22            |               | 11            | 342            | 2284          | 15.0% |
| NA                                          |               |                 | 1               |               | 1              |               | 0             |               |               |               | 2              | 18            | 11.1% |
| Adults(All)                                 | 438           | 1912            | 1081            | 67            | 603            | 274           | 274           | 190           | 10            | 227           | 5076           | 22228         | 22.8% |
| <b>TB cases notified by health facility</b> |               |                 |                 |               |                |               |               |               |               |               |                |               |       |
| P-1                                         | 245           | 170             | 278             |               | 127            | 23            | 21            | 95            | 8             | 46            | 1013           | 1523          | 66.5% |
| P-2                                         | 42            | 191             | 151             | 1             | 51             | 61            | 49            | 7             | 1             | 24            | 578            | 2022          | 28.6% |
| P-3                                         | 32            | 57              | 31              |               | 67             | 3             | 7             | 4             |               | 3             | 204            | 840           | 24.3% |
| P-4                                         | 4             | 10              | 3               |               | 13             | 19            | 3             |               |               | 26            | 78             | 251           | 31.1% |
| P-5                                         | 2             | 604             | 334             | 5             | 42             | 78            | 7             | 29            |               | 50            | 1151           | 7253          | 15.9% |
| P-6                                         |               | 39              | 40              |               | 33             |               | 6             |               |               | 48            | 166            | 1122          | 14.8% |
| P-7                                         |               | 4               | 1               | 5             | 2              | 2             | 2             |               |               | 2             | 18             | 426           | 4.2%  |
| P-8                                         | 1             | 172             | 141             |               | 81             | 10            | 82            | 12            |               |               | 499            | 1981          | 25.2% |
| P-9                                         |               | 3               | 5               | 1             | 2              |               | 0             |               |               |               | 11             | 226           | 4.9%  |
| P-10                                        | 72            | 238             | 178             | 61            | 142            | 64            | 57            | 27            |               | 40            | 879            | 3288          | 26.7% |
| P-11                                        |               | 357             | 44              |               | 14             | 15            | 0             |               |               |               | 430            | 1197          | 35.9% |
| P-12                                        | 5             | 91              | 46              | 8             | 75             | 9             | 24            | 24            |               | 3             | 285            | 979           | 29.1% |
| P-13                                        | 4             | 82              | 12              | 5             | 18             | 6             | 28            | 2             | 1             | 4             | 162            | 1634          | 9.9%  |
| P-14                                        | 56            | 1               | 41              |               | 5              | 1             | 2             |               |               |               | 106            | 788           | 13.5% |

EPTB – Extra pulmonary tuberculosis, Site-NOS: EPTB site not specified, LN-EXT-lymphatic extra-thoracic, LN-INT-Lymphatic intra thoracic, ABD-Abdomen, OAS – Osteoarticular spine , OAOS-Osteoarticular other than spine ,CNS-Central nervous system, DIS/MIL– Disseminated /Miliary TB

**S4B Table: Notified tuberculosis cases and extrapulmonary manifestation of tuberculosis by sex, age groups and health facilities in Sindh, Pakistan during 2016**

|                                             | Site-NOS      | PLEURAL         | LN-EXT          | LN-INT            | ABD            | OAS           | OAOS          | CNS             | DIS/MIL       | OTHER         | All EPTB       | All TB        | EPTB% |
|---------------------------------------------|---------------|-----------------|-----------------|-------------------|----------------|---------------|---------------|-----------------|---------------|---------------|----------------|---------------|-------|
| <b>Total</b>                                | 101<br>(2.9%) | 1190<br>(33.9%) | 1002<br>(28.5%) | 32<br>(0.9%)      | 602<br>(17.1%) | 272<br>(7.7%) | 94<br>(2.7%)  | 80<br>(2.3%)    | 21<br>(0.6%)  | 120<br>(3.4%) | 3514<br>(100%) | 15808         | 22.2% |
| <b>Median Age (IQR)</b>                     | 25<br>(18,35) | 30<br>(20,60)   | 23<br>(16,32)   | 28<br>(18.5,45.5) | 22<br>(16,33)  | 31<br>(22,50) | 29<br>(19,45) | 20<br>(15,35.5) | 22<br>(18,32) | 28<br>(19,40) | 25<br>(18,40)  | 27<br>(18,45) |       |
| <b>TB cases notified by sex</b>             |               |                 |                 |                   |                |               |               |                 |               |               |                |               |       |
| Female                                      | 46            | 560             | 666             | 21                | 377            | 152           | 46            | 48              | 10            | 57            | 1983           | 7746          | 25.6% |
| Male                                        | 55            | 630             | 336             | 11                | 225            | 120           | 48            | 32              | 11            | 63            | 1531           | 8062          | 19.0% |
| F:M                                         | 0.8           | 0.9             | 2.0             | 1.9               | 1.7            | 1.3           | 1.0           | 1.5             | 0.9           | 0.9           | 1.3            | 1.0           |       |
| <b>TB cases notified by age group</b>       |               |                 |                 |                   |                |               |               |                 |               |               |                |               |       |
|                                             |               |                 |                 |                   |                |               | 0             |                 |               |               |                |               |       |
| 0-14                                        | 9             | 58              | 173             | 5                 | 107            | 12            | 11            | 18              | 1             | 10            | 404            | 2446          | 16.5% |
| 15-24                                       | 38            | 370             | 372             | 10                | 228            | 74            | 30            | 32              | 11            | 35            | 1200           | 4345          | 27.6% |
| 25-34                                       | 25            | 262             | 234             | 5                 | 125            | 60            | 12            | 9               | 4             | 32            | 768            | 2957          | 26.0% |
| 35-44                                       | 14            | 152             | 111             | 4                 | 54             | 40            | 14            | 4               | 3             | 14            | 410            | 1875          | 21.9% |
| 45-54                                       | 10            | 143             | 61              | 4                 | 45             | 44            | 14            | 5               |               | 14            | 340            | 1835          | 18.5% |
| 55-64                                       | 4             | 122             | 33              | 2                 | 24             | 19            | 10            | 9               | 1             | 12            | 236            | 1405          | 16.8% |
| 65+                                         | 1             | 83              | 18              | 2                 | 19             | 23            | 3             | 3               | 1             | 3             | 156            | 945           | 16.5% |
| Adult (All)                                 | 92            | 1132            | 829             | 27                | 495            | 260           | 83            | 62              | 20            | 110           | 3110           | 13362         | 23.3% |
| <b>TB cases notified by health facility</b> |               |                 |                 |                   |                |               |               |                 |               |               |                |               |       |
| S-1                                         | 69            | 70              | 94              |                   | 50             | 30            | 25            | 11              | 8             | 10            | 367            | 1169          | 31.4% |
| S-2                                         | 5             | 127             | 95              | 2                 | 17             | 18            | 4             | 7               | 2             | 29            | 306            | 1145          | 26.7% |
| S-3                                         | 1             | 286             | 158             |                   | 72             | 46            | 16            | 17              |               | 15            | 611            | 4036          | 15.1% |
| S-4                                         |               | 51              | 86              |                   | 37             | 8             | 0             | 3               | 1             |               | 186            | 358           | 52.0% |
| S-5                                         | 13            | 76              | 60              | 1                 | 63             | 11            | 0             | 5               | 2             | 18            | 249            | 1450          | 17.2% |
| S-6                                         | 3             | 72              | 30              |                   | 13             | 19            | 3             | 1               | 1             | 5             | 147            | 882           | 16.7% |
| S-7                                         |               | 29              |                 |                   | 4              |               | 0             |                 |               | 18            | 51             | 239           | 21.3% |
| S-8                                         | 3             | 146             | 211             | 13                | 176            | 52            | 10            | 19              | 6             | 11            | 647            | 2688          | 53%   |
| S-9                                         | 6             | 273             | 228             | 7                 | 146            | 54            | 33            | 15              | 1             | 12            | 775            | 2722          | 28.5% |
| S-10                                        |               | 28              | 16              | 9                 | 19             | 5             | 3             |                 |               |               | 80             | 439           | 18.2% |
| S-11                                        | 1             | 32              | 24              |                   | 5              | 29            | 0             | 2               |               | 2             | 95             | 680           | 14.0% |
| <b>Total</b>                                | <b>10</b>     | <b>479</b>      | <b>479</b>      | <b>29</b>         | <b>346</b>     | <b>140</b>    | 46            | <b>36</b>       | <b>7</b>      | <b>25</b>     | <b>1597</b>    | 6529          | 24.5% |

EPTB – Extra pulmonary TB, Site-NOS: EPTB site not specified, LN-EXT-lymphatic extra-thoracic, LN-INT-Lymphatic intra thoracic, ABD-Abdomen, OAS – Osteoarticular spine, OAOS- Osteoarticular other than spine, CNS-Central nervous system, DIS/MIL – Disseminated /Miliary TB

**S4C Table: Notified tuberculosis cases and extrapulmonary manifestations of tuberculosis by sex, age groups and health facilities in Khyber Pakhtunkhwa, Pakistan during 2016**

|                                             | Site-NOS       | PLEURAL        | LN-EXT         | LN-INT        | ABD             | OAS           | OAOS          | CNS          | DIS/MIL       | OTHER         | Tot. EPTB      | All TB        | EPTB%  |
|---------------------------------------------|----------------|----------------|----------------|---------------|-----------------|---------------|---------------|--------------|---------------|---------------|----------------|---------------|--------|
| <b>Total</b>                                | 454<br>(11.6%) | 918<br>(23.4%) | 635<br>(16.2%) | 57<br>(1.5%)  | 1350<br>(34.4%) | 163<br>(4.1%) | 101<br>(2.6%) | 90<br>(2.3%) | 30<br>(0.8%)  | 132<br>(3.4%) | 3930<br>(100%) | 7802          | 50.4%  |
| <b>Median Age (IQR)</b>                     | 12<br>(5,24)   | 20<br>(10,36)  | 17<br>(9,30)   | 20<br>(13,27) | 10<br>(4,23)    | 30<br>(17,50) | 25<br>(15,45) | 16<br>(8,35) | 19<br>(15,40) | 18<br>(8,30)  | 16<br>(6,30)   | 20<br>(11,35) |        |
| <b>TB cases notified by sex</b>             |                |                |                |               |                 |               |               |              |               |               |                |               |        |
| Female                                      | 241            | 404            | 362            | 30            | 666             | 98            | 48            | 46           | 11            | 76            | 1982           | 4026          | 49.2%  |
| Male                                        | 213            | 514            | 273            | 27            | 684             | 65            | 53            | 44           | 19            | 56            | 1948           | 3776          | 51.6%  |
| F:M                                         | 1.1            | 0.8            | 1.3            | 1.1           | 1.0             | 1.5           | 0.9           | 1.0          | 0.6           | 1.4           | 1.0            | 1.1           |        |
| <b>TB cases notified by age group</b>       |                |                |                |               |                 |               |               |              |               |               |                |               |        |
| 0-14                                        | 264            | 309            | 274            | 15            | 830             | 32            | 24            | 42           | 7             | 52            | 1849           | 2583          | 71.6%  |
| 15-24                                       | 78             | 237            | 140            | 25            | 201             | 34            | 25            | 15           | 9             | 34            | 798            | 2067          | 38.6%  |
| 25-34                                       | 58             | 109            | 90             | 6             | 123             | 29            | 16            | 10           | 3             | 21            | 465            | 1037          | 44.8%  |
| 35-44                                       | 19             | 85             | 47             | 4             | 65              | 14            | 8             | 7            | 6             | 7             | 262            | 590           | 44.4%  |
| 45-54                                       | 16             | 57             | 42             | 3             | 56              | 24            | 15            | 5            | 1             | 7             | 226            | 572           | 39.5%  |
| 55-64                                       | 13             | 56             | 19             | 2             | 38              | 20            | 8             | 8            |               | 8             | 172            | 526           | 32.7%  |
| 65+                                         | 6              | 65             | 23             | 2             | 36              | 10            | 5             | 3            | 4             | 3             | 157            | 426           | 36.9%  |
| NA                                          |                |                |                |               | 1               |               | 0             |              |               |               | 1              | 1             | 100.0% |
| Adult (All)                                 | 190            | 609            | 361            | 42            | 519             | 131           | 77            | 48           | 23            | 80            | 2080           | 5218          | 39.9%  |
| <b>TB cases notified by health facility</b> |                |                |                |               |                 |               |               |              |               |               |                |               |        |
| K-1                                         | 8              | 44             | 30             | 1             | 20              | 11            | 7             | 13           | 3             | 9             | 146            | 256           | 57.0%  |
| K-2                                         | 1              | 35             | 34             |               | 43              | 7             | 5             |              | 4             | 32            | 161            | 423           | 38.1%  |
| K-3                                         | 293            | 145            | 131            | 5             | 301             | 34            | 13            | 17           | 15            | 68            | 1022           | 1830          | 55.8%  |
| K-4                                         | 117            | 182            | 186            |               | 545             | 44            | 37            | 24           | 1             | 18            | 1154           | 2035          | 56.7%  |
| K-5                                         | 15             | 23             | 12             |               | 31              | 3             | 9             | 2            |               |               | 95             | 268           | 35.4%  |
| K-6                                         | 1              | 23             | 17             |               | 13              | 10            | 2             | 1            |               | 5             | 72             | 211           | 34.1%  |
| K-7                                         | 19             | 466            | 225            | 51            | 397             | 54            | 28            | 33           | 7             |               | 1280           | 2779          | 46.1%  |

EPTB – Extra pulmonary tuberculosis, Site-NOS: EPTB site not specified, LN-EXT-lymphatic extra-thoracic, LN-INT-Lymphatic intra thoracic, ABD-Abdomen, OAS – Osteoarticular spine , OAOS- Osteoarticular other than spine ,CNS-Central nervous system, DIS/MIL – Disseminated /Miliary TB

**S4D Table: Notified tuberculosis cases and extrapulmonary manifestations of tuberculosis by sex, age groups and health facilities in Balochistan, Pakistan, during 2016**

|                                             | Site-NOS       | PLEURAL       | LN-EXT        | LN-INT      | ABD              | OAS             | OAOS          | CNS            | DIS/MIL           | OTHER            | Tot. EPTB    | All TB       | EPTB% |
|---------------------------------------------|----------------|---------------|---------------|-------------|------------------|-----------------|---------------|----------------|-------------------|------------------|--------------|--------------|-------|
| Total                                       | 204<br>(25.5%) | 83<br>(10.4%) | 59<br>(7.4%)  | 5<br>(0.6%) | 124<br>(15.5%)   | 56<br>(7.0%)    | 37<br>(4.6%)  | 205<br>(25.6%) | 12<br>(1.5%)      | 16<br>(2.0%)     | 801<br>100%  | 2111         | 37.9% |
| Median Age (IQR)                            | 7<br>(2,25)    | 24<br>(19,40) | 16<br>(10,23) | 8<br>(8,20) | 15.5<br>(3.5,30) | 38.5<br>(25,60) | 30<br>(12,40) | 8<br>(2,23)    | 21<br>(15.5,46.5) | 23.5<br>(8,38.5) | 16<br>(4,32) | 20<br>(4,40) |       |
| <b>TB cases notified by sex</b>             |                |               |               |             |                  |                 |               |                |                   |                  |              |              |       |
| Female                                      | 114            | 30            | 38            | 2           | 69               | 27              | 19            | 98             | 8                 | 10               | 415          | 1149         | 36.1% |
| Male                                        | 90             | 53            | 21            | 3           | 55               | 29              | 18            | 107            | 4                 | 6                | 386          | 962          | 40.1% |
| F:M                                         | 1.3            | 0.6           | 1.8           | 0.7         | 1.3              | 0.9             | 1.1           | 0.9            | 2.0               | 1.7              | 1.1          | 1.2          |       |
| <b>TB cases notified by age group</b>       |                |               |               |             |                  |                 |               |                |                   |                  |              |              |       |
| 0-14                                        | 127            | 11            | 23            | 2           | 59               | 9               | 11            | 126            | 3                 | 5                | 376          | 870          | 43.2% |
| 15-24                                       | 22             | 31            | 18            | 2           | 19               | 4               | 4             | 29             | 4                 | 4                | 137          | 309          | 44.3% |
| 25-34                                       | 21             | 15            | 7             |             | 18               | 9               | 11            | 11             |                   | 2                | 94           | 276          | 34.1% |
| 35-44                                       | 6              | 6             | 3             | 1           | 11               | 9               | 3             | 10             | 1                 | 3                | 53           | 145          | 36.6% |
| 45-54                                       | 8              |               | 6             |             | 8                | 9               | 3             | 4              | 2                 | 1                | 41           | 142          | 28.9% |
| 55-64                                       | 12             | 6             | 2             |             | 5                | 4               | 2             | 8              |                   | 1                | 40           | 190          | 21.1% |
| 65+                                         | 8              | 14            |               |             | 4                | 12              | 3             | 17             | 2                 |                  | 60           | 179          | 33.5% |
| Adult(All)                                  | 77             | 72            | 36            | 3           | 65               | 47              | 26            | 79             | 9                 | 11               | 425          | 1241         | 34.2% |
| <b>TB cases notified by health facility</b> |                |               |               |             |                  |                 |               |                |                   |                  |              |              |       |
| B-1                                         | 5              | 38            | 37            | 4           | 55               | 27              | 17            | 195            | 12                | 9                | 399          | 626          | 63.7% |
| B-2                                         | 8              | 45            | 18            |             | 17               | 9               | 6             | 10             |                   | 7                | 120          | 600          | 20.0% |
| B-3                                         | 96             |               |               |             |                  | 1               |               |                |                   |                  | 97           | 343          | 28.3% |
| B-4                                         | 95             |               | 4             | 1           | 52               | 19              | 14            |                |                   |                  | 185          | 542          | 34.1% |

EPTB – Extra pulmonary tuberculosis, Site-NOS: EPTB site not specified, LN-EXT-lymphatic extra-thoracic, LN-INT-Lymphatic intra thoracic, ABD-Abdomen, OAS – Osteoarticular spine , OAOS- Osteoarticular other than spine ,CNS-Central nervous system, DIS/MIL– Disseminated /Miliary TB.

**S4E Table: Notified tuberculosis cases and extrapulmonary manifestations of tuberculosis by sex, age groups and health facilities in Federally Administered Tribal Areas, Pakistan during 2016**

|                                             | Site-NOS    | PLEURAL        | LN-EXT        | LN-INT     | ABD            | OAS               | OAOS            | CNS           | DIS/MIL       | OTHER         | All EPTB      | All TB   | EPTB% |
|---------------------------------------------|-------------|----------------|---------------|------------|----------------|-------------------|-----------------|---------------|---------------|---------------|---------------|----------|-------|
| Total                                       | 7<br>(1.5%) | 104<br>(22.0%) | 47<br>(10%)   | 0<br>(0%)  | 235<br>(49.8%) | 24<br>(5.1%)      | 8<br>(1.7%)     | 19<br>(4.0%)  | 1<br>(0.2%)   | 27<br>(5.7%)  | 472<br>(100%) | 938      | 50.3% |
| Median Age<br>(IQR)                         | 6<br>(5,25) | 40<br>(23,60)  | 19<br>(10,30) | 0<br>(0,0) | 3<br>(2,16)    | 40.5<br>(30,57.5) | 40<br>(22.5,50) | 25<br>(10,40) | 40<br>(40,40) | 27<br>(15,40) | 18<br>(3,35)  | 24(9,42) |       |
| <b>TB cases notified by sex</b>             |             |                |               |            |                |                   |                 |               |               |               |               |          |       |
| Female                                      | 1           | 32             | 22            |            | 112            | 8                 | 5               | 7             | 1             | 18            | 206           | 440      | 46.8% |
| Male                                        | 6           | 72             | 25            |            | 123            | 16                | 3               | 12            |               | 9             | 266           | 498      | 53.4% |
| F:M                                         | 0.0         | 0.3            | 0.9           |            | 0.9            | 0.5               | 1.7             | 0.6           |               | 2.0           | 0.8           | 0.9      |       |
| <b>TB cases notified by age group</b>       |             |                |               |            |                |                   |                 |               |               |               |               |          |       |
| 0-14                                        | 5           | 8              | 18            |            | 170            | 1                 | 1               | 6             |               | 6             | 215           | 282      | 76.2% |
| 15-24                                       |             | 22             | 10            |            | 30             | 1                 | 1               | 3             |               | 5             | 72            | 192      | 37.5% |
| 25-34                                       | 1           | 14             | 9             |            | 21             | 6                 | 1               | 3             |               | 7             | 62            | 152      | 40.8% |
| 35-44                                       | 1           | 14             | 3             |            | 7              | 6                 | 2               | 3             | 1             | 3             | 40            | 80       | 50.0% |
| 45-54                                       |             | 14             | 4             |            | 4              | 1                 | 1               | 2             |               | 3             | 29            | 69       | 42.0% |
| 55-64                                       |             | 10             | 1             |            | 2              | 4                 | 1               | 1             |               | 2             | 21            | 74       | 28.4% |
| 65+                                         |             | 22             | 2             |            | 1              | 5                 | 1               | 1             |               | 1             | 33            | 86       | 38.4% |
| NA                                          |             |                |               |            |                |                   |                 |               |               |               |               | 3        | 0.0%  |
| Adult (All)                                 | 2           | 96             | 29            | 0          | 65             | 23                | 7               | 13            | 1             | 21            | 257           | 653      | 39.4% |
| <b>TB cases notified by health facility</b> |             |                |               |            |                |                   |                 |               |               |               |               |          |       |
| F-1                                         | 7           | 78             | 33            |            | 138            | 13                | 6               | 14            | 1             | 24            | 314           | 650      | 48.3% |
| F-2                                         | 0           | 26             | 14            |            | 97             | 11                | 2               | 5             |               | 3             | 158           | 288      | 54.9% |

EPTB – Extra pulmonary tuberculosis, Site-NOS: EPTB site not specified, LN-EXT-lymphatic extra-thoracic, LN-INT-Lymphatic intra thoracic, ABD-Abdomen, OAS – Osteoarticular spine, OAOS- Osteoarticular other than spine, CNS-Central nervous system, DIS/MIL– Disseminated /Miliary TB

**S4F Table: Notified tuberculosis cases and extrapulmonary manifestations of tuberculosis by sex, age groups and health facilities in Gilgit Baltistan, Pakistan during 2016**

| GB                                          | Site-NOS      | PLEURAL         | LN-EXT         | LN-INT     | ABD            | OAS           | OAOS          | CNS          | DIS/MIL       | OTHER          | All- EPTB     | All TB       | EPTB% |
|---------------------------------------------|---------------|-----------------|----------------|------------|----------------|---------------|---------------|--------------|---------------|----------------|---------------|--------------|-------|
| <b>Total</b>                                | 5<br>(1.1%)   | 44<br>(10.1%)   | 105<br>(24.0%) | (0.0%)     | 201<br>(46.0%) | 31<br>(7.1%)  | 25<br>(5.7%)  | 13<br>(3.0%) | 3<br>(0.7%)   | 10<br>(2.3%)   | 437<br>(100%) | 1693         | 25.8% |
| <b>Median Age (IQR)</b>                     | 26<br>(20,29) | 25<br>(18,52.5) | 22<br>(12,36)  | 0<br>(0,0) | 5<br>(2,17)    | 40<br>(28,60) | 20<br>(16,23) | 17<br>(7,35) | 18<br>(13,22) | 18.5<br>(4,30) | 17<br>(3,30)  | 18<br>(3,32) |       |
| <b>TB cases notified by sex</b>             |               |                 |                |            |                |               |               |              |               |                |               |              |       |
| Female                                      | 2             | 21              | 66             |            | 111            | 14            | 17            | 8            | 1             | 5              | 245           | 952          | 25.7% |
| Male                                        | 3             | 23              | 39             |            | 90             | 17            | 8             | 5            | 2             | 5              | 192           | 741          | 25.9% |
| F:M                                         | 0.7           | 0.9             | 1.7            |            | 1.2            | 0.8           | 2.1           | 1.6          | 0.5           | 1.0            | 1.3           | 1.3          |       |
| <b>TB cases notified by age group</b>       |               |                 |                |            |                |               |               |              |               |                |               |              |       |
|                                             |               |                 |                |            |                |               |               |              |               |                | 0.8           | 0.8          |       |
| 0-14                                        | 1             | 3               | 31             |            | 141            | 1             | 5             | 5            | 1             | 4              | 192           | 735          | 26.1% |
| 15-24                                       | 1             | 18              | 23             |            | 27             | 4             | 9             | 3            | 2             | 2              | 89            | 338          | 26.3% |
| 25-34                                       | 2             | 7               | 20             |            | 15             | 4             | 5             | 1            |               | 3              | 57            | 200          | 28.5% |
| 35-44                                       |               | 2               | 10             |            | 5              | 8             | 2             | 1            |               | 1              | 29            | 125          | 23.2% |
| 45-54                                       |               | 3               | 8              |            | 7              | 2             | 2             | 1            |               |                | 23            | 102          | 22.5% |
| 55-64                                       | 1             | 6               | 5              |            | 3              | 8             | 2             |              |               |                | 25            | 105          | 23.8% |
| 65+                                         |               | 5               | 8              |            | 3              | 4             |               | 2            |               |                | 22            | 88           | 25.0% |
| Adult (All)                                 | 4             | 41              | 74             | 0          | 60             | 30            | 20            | 8            | 2             | 6              | 245           | 958          | 25.6% |
| <b>TB cases notified by health facility</b> |               |                 |                |            |                |               |               |              |               |                |               |              |       |
| G-1                                         | 3             | 9               | 14             |            | 6              | 1             | 1             | 1            |               | 2              | 37            | 120          | 30.8% |
| G-2                                         | 2             | 13              | 32             |            | 24             | 20            | 7             | 9            | 3             | 3              | 113           | 339          | 33.3% |
| G-3                                         |               | 14              | 13             |            | 80             | 4             | 4             | 2            |               | 3              | 120           | 347          | 34.6% |
| G-4                                         |               |                 | 21             |            | 21             | 2             | 11            |              |               | 1              | 56            | 234          | 23.9% |
| G-5                                         |               | 8               | 25             |            | 70             | 4             | 2             | 1            |               | 1              | 111           | 653          | 17.0% |

EPTB – Extra pulmonary tuberculosis, Site-NOS: EPTB site not specified, LN-EXT-lymphatic extra-thoracic, LN-INT-Lymphatic intra thoracic, ABD-Abdomen, OAS – Osteoarticular spine, OAOS- Osteoarticular other than spine, CNS-Central nervous system, DIS/MIL – Disseminated /Miliary TB

**S4G Table: Notified tuberculosis cases and extrapulmonary manifestations of tuberculosis by sex, age groups and health facilities in Azad Jammu & Kashmir, Pakistan, during 2016**

|                                             | Site-NOS           | PLEURAL               | LN-EXT               | LN-INT             | ABD                  | OAS                 | OAOS                | CNS                 | DIS/MIL            | OTHER               | Tot.EPTB             | All TB        | EPTB%        |
|---------------------------------------------|--------------------|-----------------------|----------------------|--------------------|----------------------|---------------------|---------------------|---------------------|--------------------|---------------------|----------------------|---------------|--------------|
| <b>Total</b>                                | <b>9</b><br>(2.6%) | <b>136</b><br>(39.2%) | <b>65</b><br>(18.7%) | <b>1</b><br>(0.3%) | <b>57</b><br>(16.4%) | <b>26</b><br>(7.5%) | <b>12</b><br>(3.5%) | <b>13</b><br>(3.7%) | <b>5</b><br>(1.4%) | <b>23</b><br>(6.6%) | <b>347</b><br>100.0% | <b>924</b>    | <b>37.6%</b> |
| <b>Median Age(IQR)</b>                      | 30<br>(30,40)      | 33<br>(24,56)         | 23<br>(14,18)        | 23<br>(23,23)      | 30<br>(18,46)        | 45<br>(35,58)       | 30<br>(24,48)       | 38<br>(17,48)       | 43<br>(22,52)      | 30<br>(22,45)       | 30<br>(21,50)        | 35<br>(21,55) |              |
| <b>TB cases notified by sex</b>             |                    |                       |                      |                    |                      |                     |                     |                     |                    |                     |                      |               |              |
| Female                                      | 4                  | 48                    | 34                   |                    | 32                   | 13                  | 7                   | 8                   | 3                  | 15                  | 164                  | 466           | 35.2%        |
| Male                                        | 5                  | 88                    | 31                   | 1                  | 25                   | 13                  | 5                   | 5                   | 2                  | 8                   | 183                  | 458           | 40.0%        |
| F:M                                         | 0.8                | 0.5                   | 1.1                  | 0.0                | 1.3                  | 1.0                 | 1.4                 | 1.6                 | 1.5                | 1.9                 | 0.9                  | 1.0           |              |
| <b>TB cases notified by age group</b>       |                    |                       |                      |                    |                      |                     |                     |                     |                    |                     |                      |               |              |
| 0-14                                        | 1                  | 2                     | 18                   |                    | 8                    |                     | 1                   | 2                   |                    | 2                   | 34                   | 83            | 41.0%        |
| 15-24                                       |                    | 36                    | 18                   | 1                  | 16                   | 2                   | 2                   | 2                   | 2                  | 4                   | 83                   | 225           | 36.9%        |
| 25-34                                       | 4                  | 32                    | 8                    |                    | 8                    | 4                   | 4                   | 2                   |                    | 7                   | 69                   | 149           | 46.3%        |
| 35-44                                       | 3                  | 13                    | 7                    |                    | 10                   | 7                   | 1                   | 2                   | 1                  | 4                   | 48                   | 109           | 44.0%        |
| 45-54                                       |                    | 17                    | 7                    |                    | 6                    | 2                   | 2                   | 3                   | 1                  | 4                   | 42                   | 118           | 35.6%        |
| 55-64                                       |                    | 9                     | 2                    |                    | 2                    | 10                  |                     | 1                   | 1                  | 1                   | 26                   | 98            | 26.5%        |
| 65+                                         | 1                  | 27                    | 5                    |                    | 7                    | 1                   | 2                   | 1                   |                    | 1                   | 45                   | 142           | 31.7%        |
| Adult (All)                                 | 8                  | 134                   | 47                   | 1                  | 49                   | 26                  | 11                  | 11                  | 5                  | 21                  | 313                  | 841           | 37.2%        |
| <b>TB cases notified by health facility</b> |                    |                       |                      |                    |                      |                     |                     |                     |                    |                     |                      |               |              |
| A-1                                         | 6                  | 28                    | 20                   | 1                  | 16                   | 7                   | 1                   | 1                   |                    | 4                   | 84                   | 188           | 44.7%        |
| A-2                                         |                    | 24                    | 3                    |                    | 12                   | 4                   | 1                   | 3                   | 4                  | 9                   | 60                   | 174           | 34.5%        |
| A-3                                         | 1                  | 21                    | 15                   |                    | 5                    | 5                   | 3                   | 2                   |                    | 3                   | 55                   | 179           | 30.7%        |
| A-4                                         | 2                  | 58                    | 25                   |                    | 20                   | 9                   | 5                   | 6                   | 1                  | 7                   | 133                  | 310           | 42.9%        |
| A-5                                         |                    | 5                     | 2                    |                    | 4                    | 1                   | 2                   | 1                   |                    |                     | 15                   | 73            | 20.5%        |

EPTB – Extra pulmonary tuberculosis, Site-NOS: EPTB site not specified, LN-EXT-lymphatic extra-thoracic, LN-INT-Lymphatic intra thoracic, ABD-Abdomen, OAS – Osteoarticular spine , OAOS- Osteoarticular other than spine ,CNS-Central nervous system, DIS/MIL – Disseminated /Miliary TB

**SGH Table: Notified tuberculosis cases and extrapulmonary manifestations of tuberculosis by sex, age groups and health facilities in Islamabad capital Territory, Pakistan during 2016**

|                        | Site-NOS          | PLEURAL         | LN-EXT         | LN-INT      | ABD             | OAS           | OAOS              | CNS            | DIS/MIL           | OTHER         | Tot.EPTB      | All TB        | EPTB% |
|------------------------|-------------------|-----------------|----------------|-------------|-----------------|---------------|-------------------|----------------|-------------------|---------------|---------------|---------------|-------|
| Total                  | 96<br>(13.5%)     | 174<br>(24.5%)  | 182<br>(25.7%) | 0<br>(0.0%) | 72<br>(10.2%)   | 47<br>(6.6%)  | 8<br>(1.1%)       | 105<br>(14.8%) | 12<br>(1.7%)      | 13<br>(1.8%)  | 709<br>(100%) | 1286          | 55.1% |
| Median Age<br>(IQR)    | 30<br>(20.5,45.5) | 29.5<br>(22,50) | 30<br>(20,43)  | 0<br>(0,0)  | 30.5<br>(23,47) | 36<br>(27,54) | 40.5<br>(37,52.5) | 32<br>(20,50)  | 33<br>(21.5,53.5) | 29<br>(17,48) | 30<br>(22,48) | 32<br>(22,50) |       |
| <b>SEX</b>             |                   |                 |                |             |                 |               |                   |                |                   |               |               |               |       |
| Female                 | 44                | 67              | 104            |             | 33              | 17            | 5                 | 54             | 7                 | 5             | 336           | 580           | 57.9% |
| Male                   | 52                | 107             | 78             |             | 39              | 30            | 3                 | 51             | 5                 | 8             | 373           | 706           | 52.8% |
| F:M                    | 0.8               | 0.6             | 1.3            |             | 0.8             | 0.6           | 1.7               | 1.1            | 1.4               | 0.6           | 0.9           | 0.8           |       |
| <b>AGE GROUP</b>       |                   |                 |                |             |                 |               |                   |                |                   |               |               |               |       |
| 0-14                   | 5                 | 6               | 8              |             | 2               | 2             |                   | 9              |                   | 3             | 35            | 55            | 63.6% |
| 15-24                  | 27                | 55              | 59             |             | 22              | 7             | 1                 | 28             | 4                 | 2             | 205           | 358           | 57.3% |
| 25-34                  | 21                | 37              | 39             |             | 17              | 12            |                   | 20             | 2                 | 3             | 151           | 254           | 59.4% |
| 35-44                  | 16                | 20              | 33             |             | 10              | 11            | 4                 | 14             | 1                 |               | 109           | 192           | 56.8% |
| 45-54                  | 14                | 20              | 18             |             | 10              | 4             | 1                 | 15             | 2                 | 2             | 86            | 171           | 50.3% |
| 55-64                  | 7                 | 19              | 14             |             | 7               | 4             | 1                 | 10             | 1                 | 1             | 64            | 127           | 50.4% |
| 65+                    | 6                 | 17              | 11             |             | 4               | 7             | 1                 | 9              | 2                 | 2             | 59            | 129           | 45.7% |
| Adults (All)           | 91                | 168             | 174            | 0           | 70              | 45            | 8                 | 96             | 12                | 10            | 674           | 1231          | 54.8% |
| <b>Health Facility</b> |                   |                 |                |             |                 |               |                   |                |                   |               |               |               |       |
| I-1                    | 96                | 174             | 179            |             | 71              | 47            | 8                 | 105            | 11                | 10            | 701           | 1256          | 55.8% |
| I-2                    |                   |                 | 3              |             | 1               |               |                   |                | 1                 | 3             | 8             | 30            | 26.7% |

EPTB – Extra pulmonary tuberculosis, Site-NOS: EPTB site not specified, LN-EXT-lymphatic extra-thoracic, LN-INT-Lymphatic intra thoracic, ABD-Abdomen, OAS – Osteoarticular spine, OAOS- Osteoarticular other than spine, CNS-Central nervous system, Dis/Mil – Disseminated /Miliary TB
